# Supplementary material for: Rational design of a microbial consortium of mucosal sugar utilizers reduces Clostridiodes difficile colonization
Source: PubMed Central journal article supplement (PMC7547075; doi:10.1038/s41467-020-18928-1), 2020-10-09
Supplement: 41467_2020_18928_MOESM1_ESM.pdf [file 41467_2020_18928_MOESM1_ESM.pdf]

## Supplementary Information

# Rational design of a microbial consortium of mucosal sugar utilizers reduces *Clostridiodes difficile* colonization

Fátima C. Pereira, Kenneth Wasmund, Iva Cobankovic, Nico Jehmlich, Craig W. Herbold, Kang Soo Lee, Barbara Sziranyi, Cornelia Vesely, Thomas Decker, Roman Stocker, Benedikt Warth, Martin von Bergen, Michael Wagner and David Berry

### **Table of Contents:**

|                                |    |
|--------------------------------|----|
| Supplementary Figures 1-9..... | 2  |
| Supplementary Tables 1-8.....  | 14 |

## Supplementary Figures

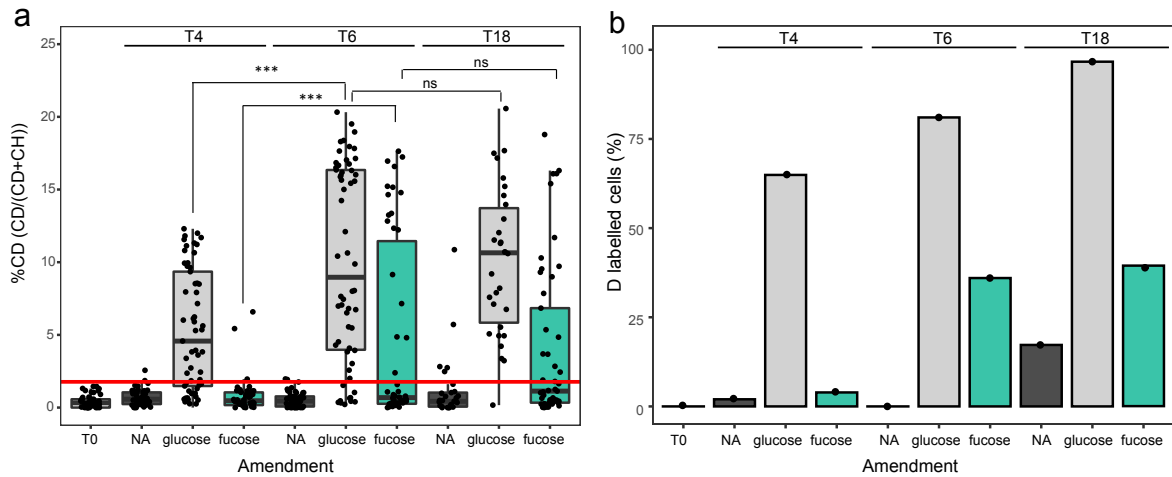

**Supplementary Figure 1. Detection of D incorporation into microbiota cells at different time points of incubation with D<sub>2</sub>O.** A mouse colon community was incubated with glucose (positive control) or with fucose (as a representative of a mucosal sugar) in the presence of 50% D<sub>2</sub>O for 0, 4, 6 and 18 hours. **a**, Deuterium incorporation (measured by %CD) of randomly-selected cells per microcosm at 0, 4, 6 and 18 hours post-amendment of either glucose or fucose. NA= no compound amended. The red horizontal line at 2.34 %CD indicates the threshold for considering a cell labeled (determined by calculating the mean + 3 SD of %CD in randomly selected cells from a sample incubated without addition of heavy water). Boxes represent median, first and third quartile. Whiskers extend to the highest and lowest values that are within one and a half times the interquartile range. \*\*\* $p < 0.0001$ ; ns=non-significant; two-tailed Welch two-sample  $t$  test. **b**, Percentage of cells labeled (i.e., with %CD higher than threshold) per time point/condition as represented in **a**. After 4 hours of incubation we observed that a large percentage (64%) of cells had incorporated D to detectable levels in response to glucose, but not to fucose, which may be related with different pathways and energy gained from the catabolism of the two sugars. Levels of D incorporation (%CD) as well as the percentage of labeled cells increased by hour 6 in both microcosms. At a later time point (18 hours), levels of D incorporation as well as percentage of D labeled cells remained stable or increased only slightly, but we do observe an increase in the percentage of labeled cells in the negative control (no amendment), most likely due to cross-feeding. We therefore selected 6 hours as the incubation time for our experiments, as there was enough D labeling to be detected by Raman in response to both the positive control and mucosal sugar, while cross-feeding at this time point still appeared to be minimal. Source data are provided as a Source Data file.

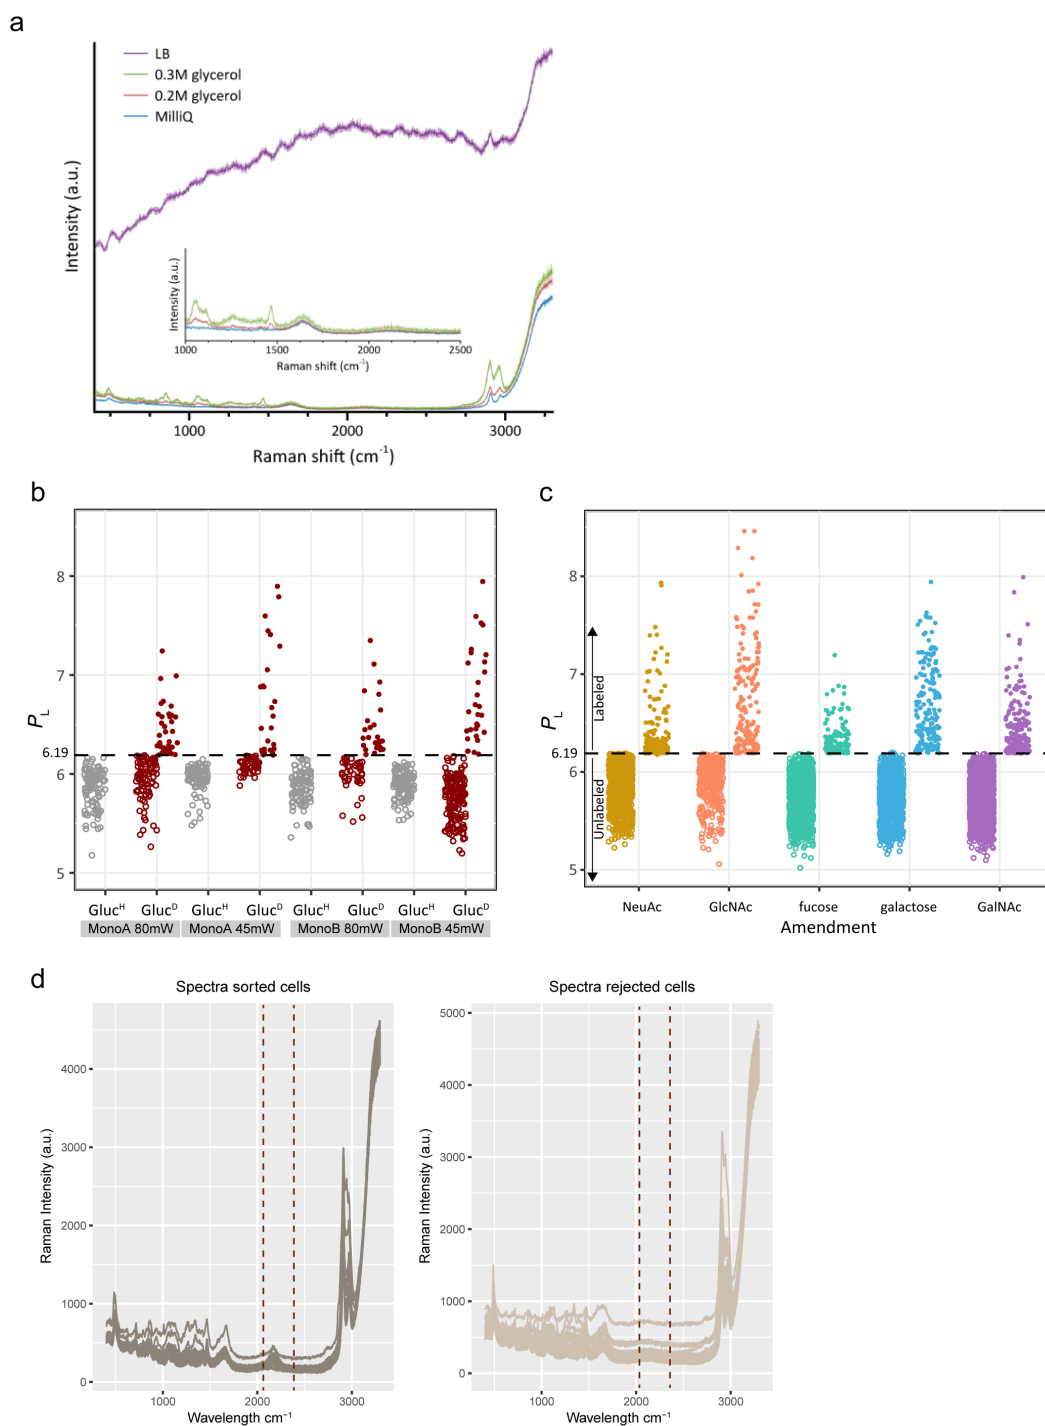

**Supplementary Figure 2.** RACS-analysis of microcosm samples. **a**, Background RACS spectra of MilliQ, 0.2 M Glycerol and 0.3 M glycerol (balanced with MilliQ) and LB medium. The addition of glycerol into MilliQ did not significantly change the intensity at the C–D peak (2,040–2,300  $\text{cm}^{-1}$ ), whereas the intensity at other spectral regions (<1,500  $\text{cm}^{-1}$  and >2,700  $\text{cm}^{-1}$ ) increased. Inset shows the spectra of those three liquids at the spectral region 1,000–2,500  $\text{cm}^{-1}$  for better discrimination. Some

liquids (e.g., LB) generate a highly fluorescent background that interferes with the identification of deuterated cells. Each spectrum represents the mean and SD of three independent measurements. **b**,  $P_L$  values of cells from glucose-supplemented microcosms of two different incubations (MonoA and MonoB), suspended in 0.3 M glycerol and analyzed by the two platform versions (version 1 and 2, see Methods) operating with two different laser intensities (45 mW and 80 mW). Control (Gluc<sup>H</sup>;  $n=446$ , grey) and test samples (Gluc<sup>D</sup>;  $n=456$ ) denote cells from colon microbiota incubated for 6 h in H<sub>2</sub>O- or 50% D<sub>2</sub>O-containing PBS, respectively. The dashed line denotes the threshold  $P_L$  value adopted based on these controls ( $P_L = 6.19$ ). **c**,  $P_L$  values of cells from microcosms supplemented with different mucosal monosaccharides and mucin, suspended in 0.3 M glycerol. Cells with a  $P_L > 6.19$  were considered labeled and sorted, while cells with a  $P_L \leq 6.19$  were considered unlabeled and rejected. Dots represent all cells analyzed for each amendment from at least 6 independent sorts from samples originated from two independent experiments (MonoA and MonoB) (Supplementary Table 1). **d**, Exemplary Raman spectra of sorted (left panel) and rejected cells (right panel) from NeuAc-supplemented microcosms. The C-D peak-region of the Raman spectrum (between 2,040 and 2,300 cm<sup>-1</sup>) is depicted using vertical dashed lines. Source data are provided as a Source Data file.

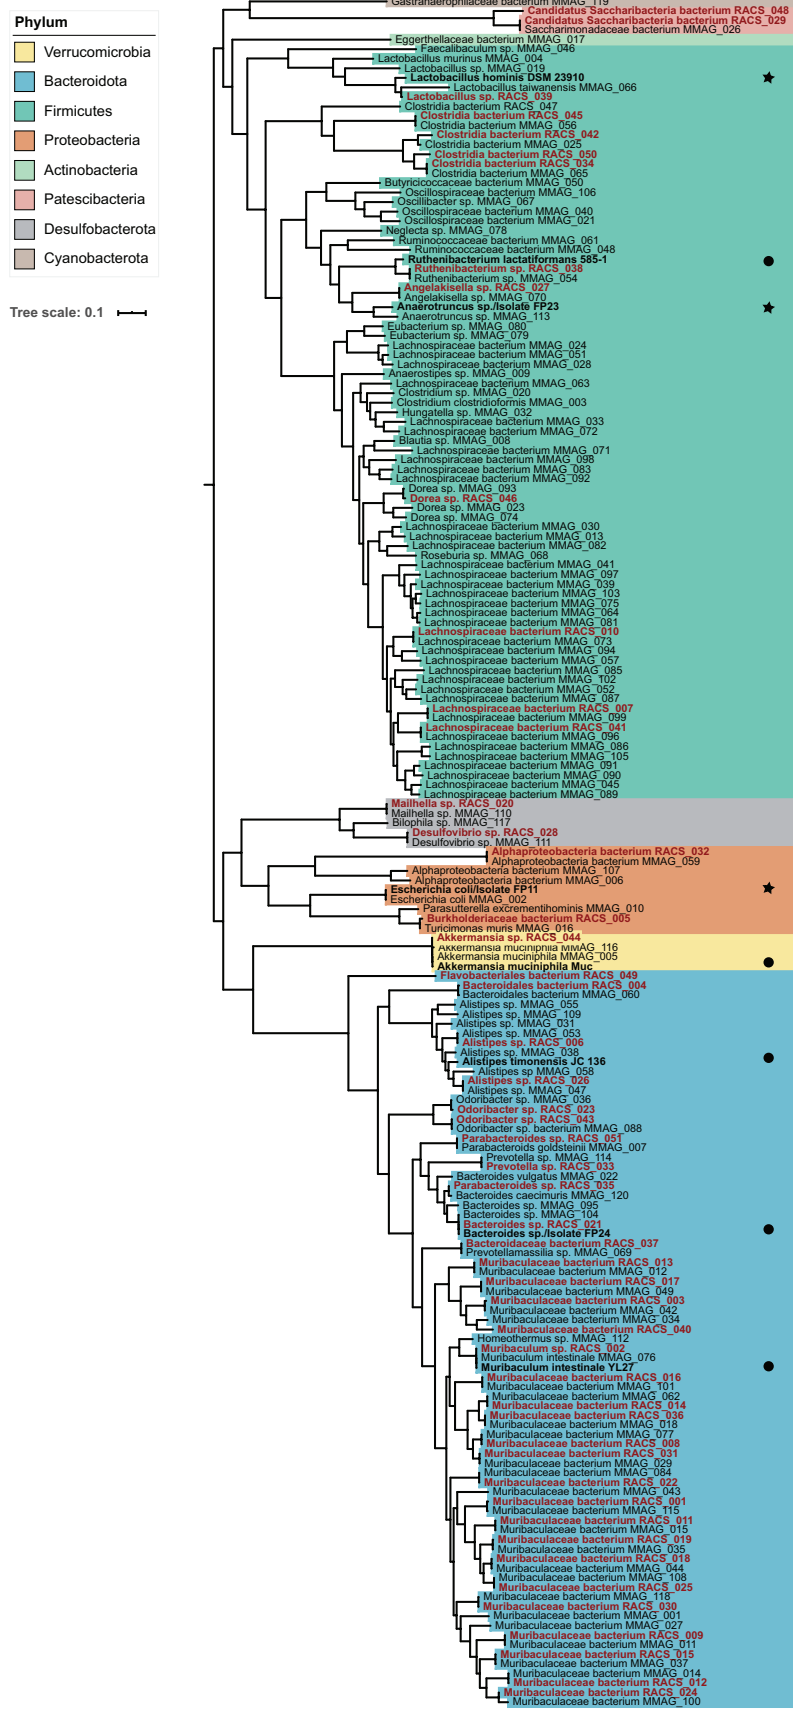

**Supplementary Figure 3.** Phylogenomic analysis of metagenome-assembled genomes recovered from sequencing of RACS sorted fractions (RACS\_01 to RACS\_051), from metagenomics sequencing of initial (T0), unsorted microcosms (MMAG001-MMAG120) and from the BacMix and BacMixC consortium members. The tree was generated with the maximum likelihood algorithm of FastTree using a concatenated alignment of 34 single copy marker gene protein sequences. The tree was rooted at mid-point and the scale bar represents 10% sequence divergence. Color shades denoted the bacterial phylum of each MAG. RACS-recovered MAGs are highlighted in red. BacMix and BacMixC genomes are highlighted in bold and marked with circles or stars, respectively.

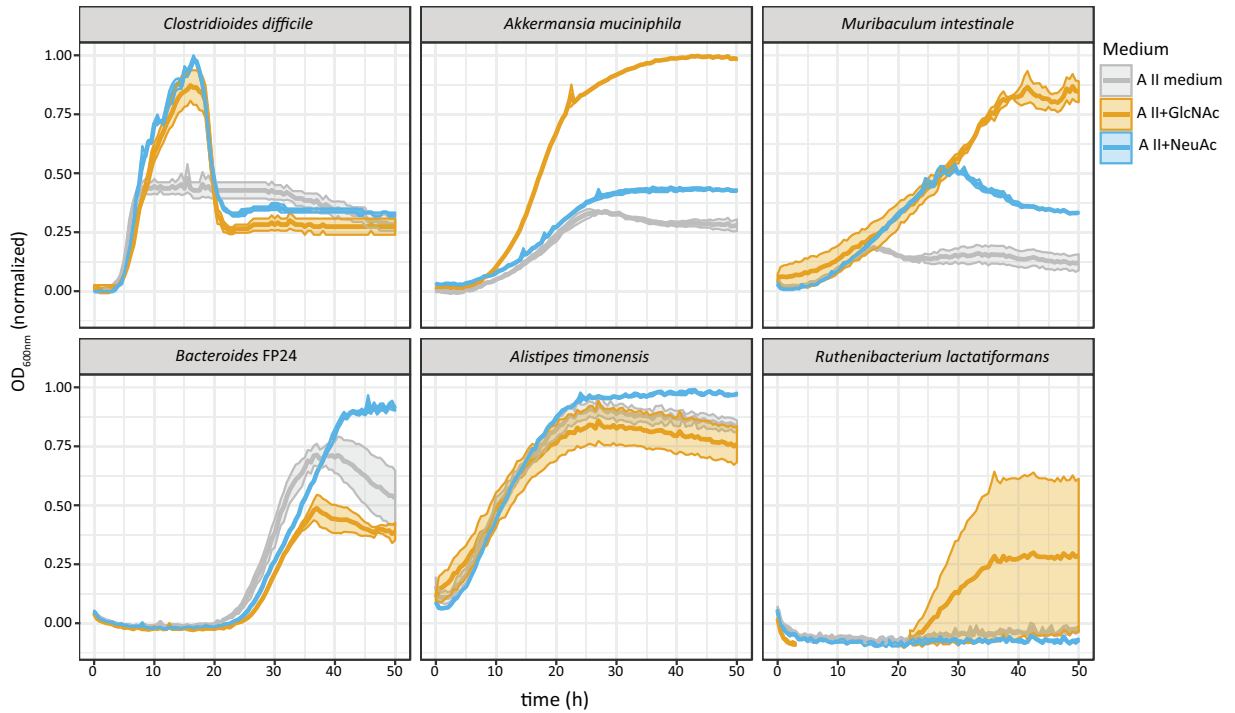

**Supplementary Figure 4.** Optical density (OD) measurements (600nm) of *C. difficile* and BacMix consortium members cultures grown independently in diluted A II medium non-supplemented or supplemented with the O-glycan sugars NeuAc (0.125% w/v) or GlcNAc (0.125% w/v). Line depicts mean values and shaded region s.e.m. from triplicates. Values were normalized to the maximum OD level attained by each individual strain. Source data are provided as a Source Data file.

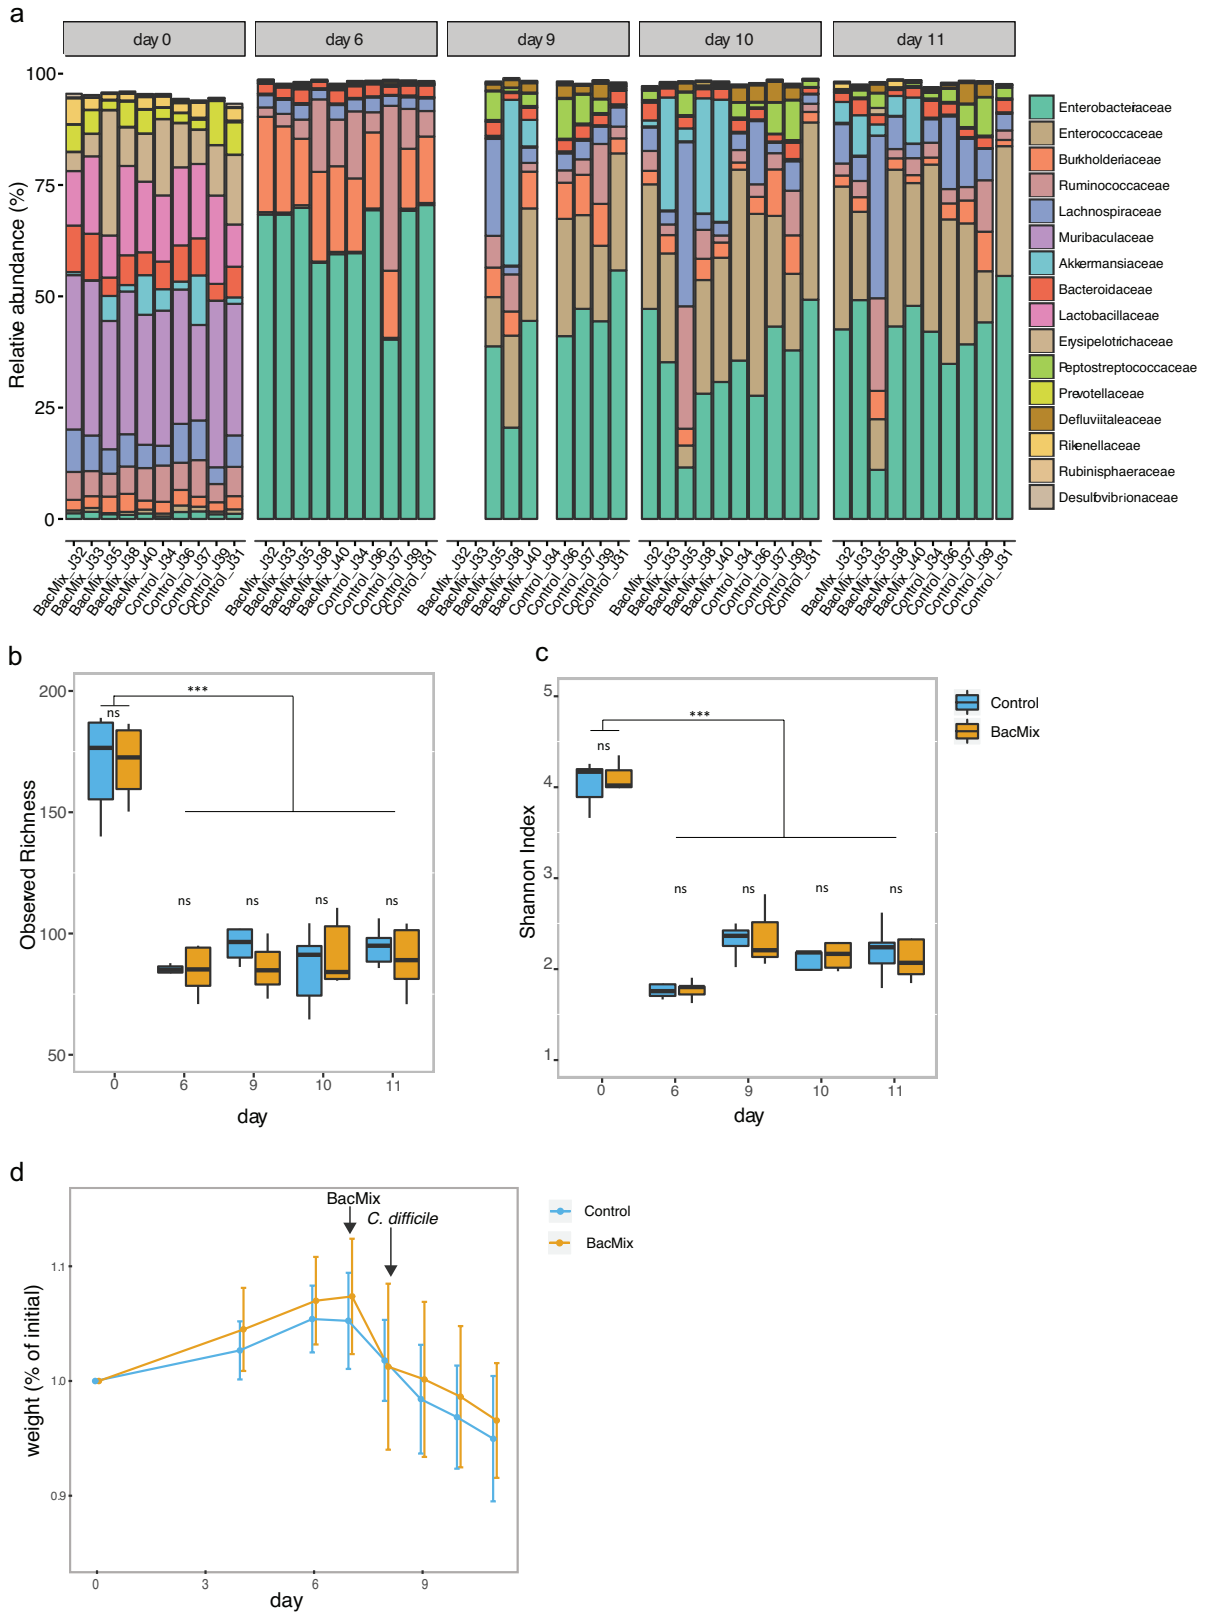

**Supplementary Figure 5. a**, Intestinal microbiota composition (at the family level) of



individual mice from Control and BacMix groups at the different indicated time points of the in vivo adoptive transfer experiment. Blank spaces indicate that no data is available because no fecal pellet from that mouse could be collected at that particular time point. **b**, **c**, Microbiota alpha-diversity metrics (Observed Richness (**b**) and Shannon index (**c**)) for the same time points and mice analyzed in **a**. Boxes represent median, first and third quartile and whiskers extend to the highest and lowest values that are within one and a half times the interquartile range (\*\* $p < 0.0001$  for both Observed Richness and Shannon Index; ns=non-significant; two-sided Mann-Whitney test). **d**, Evolution of mice weight throughout the in vivo adoptive transfer experiment ( $n=10$ /group). Source data are provided as a Source Data file.

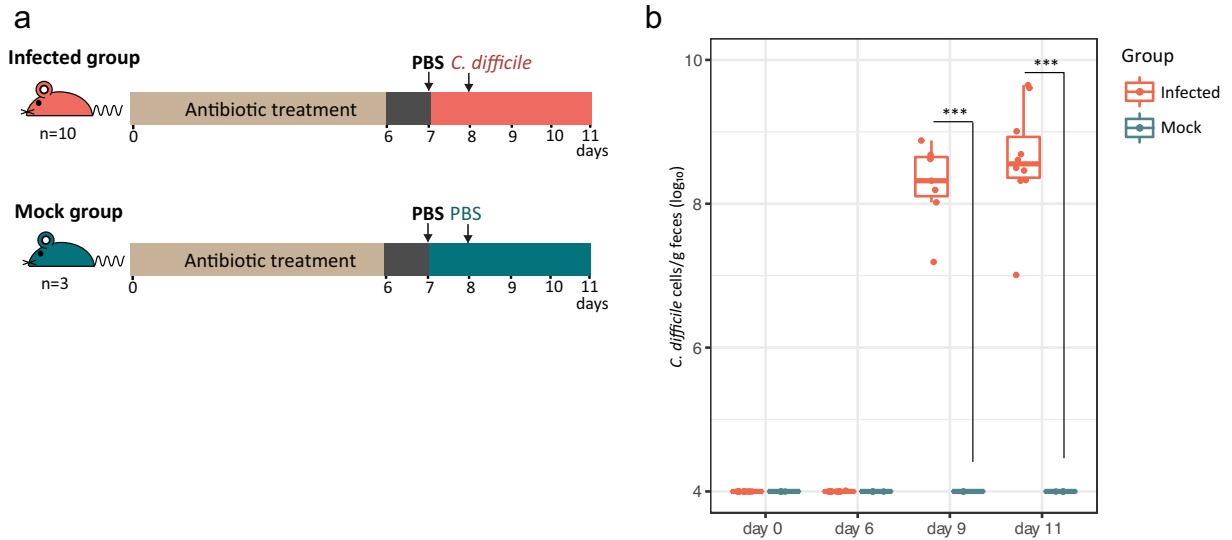

**Supplementary Figure 6.** *C. difficile* burden over time in infected and mock-infected mice. **a**, Outline of the infection experiment. **b**, *C. difficile* titers in fecal samples of antibiotic-treated mice infected with *C. difficile* or mock infected, assessed by qPCR. Boxes represent median, first and third quartile. Whiskers extend to the highest and lowest values that are within one and a half times the interquartile range;  $n=3$  (mock group) and  $n=10$  (infected group) (\*\* $p < 0.0001$ ; two-tailed Welch two sample  $t$  test). Detection limit:  $10^4$  cells/g feces. Source data are provided as a Source Data file.

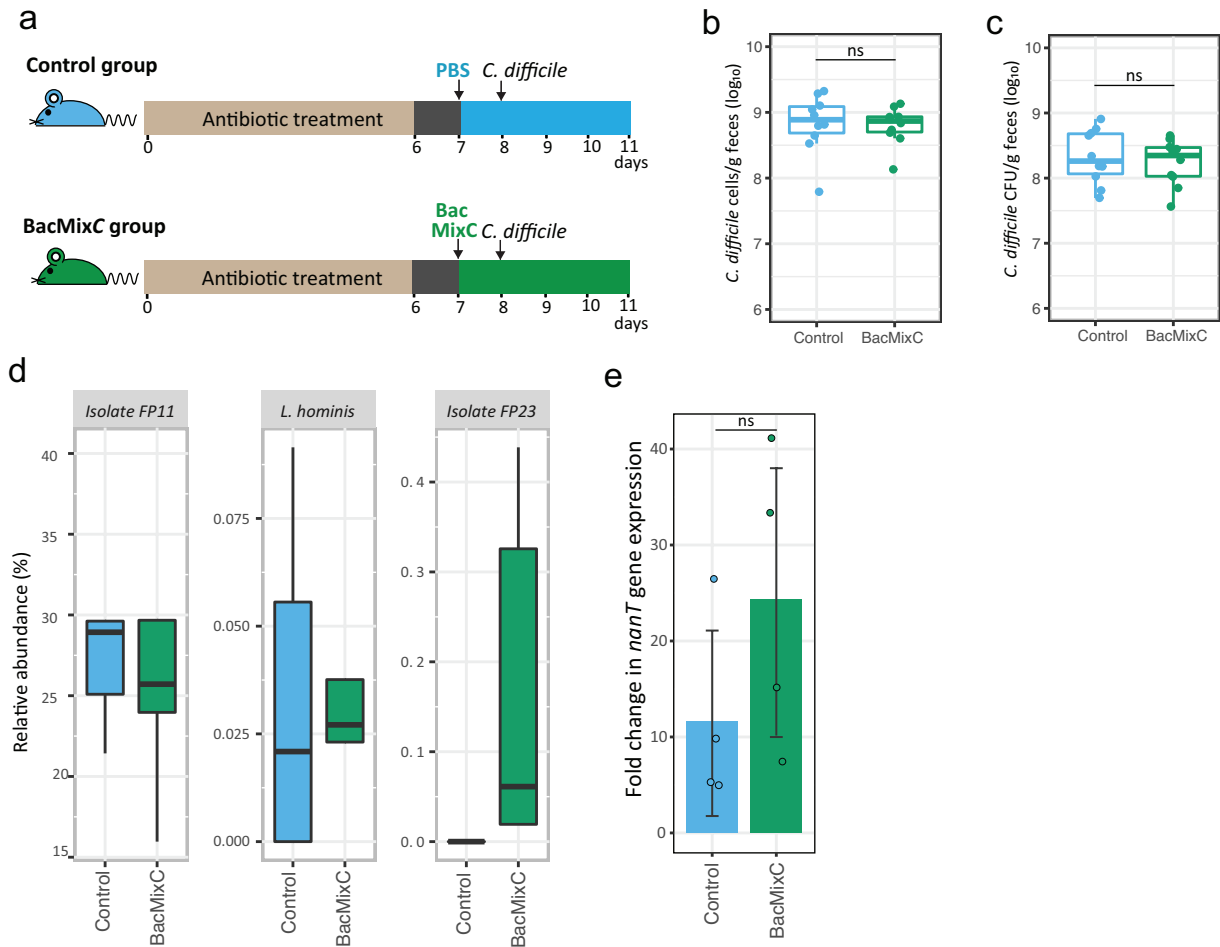

**Supplementary Figure 7.** Adoptive transfer of a control BacMixC consortium after antibiotic exposure of conventional mice does impact *C. difficile* levels. **a**, Schematic representation of the in vivo adoptive transfer experiment with the control bacteriotherapy BacMixC. **b**, **c**, Density of *C. difficile* three days post-infection in feces of antibiotic-treated control (blue) and BacMixC-recipient (green) mice determined by qPCR (**b**) or selective-medium plating (**c**) ( $n=10/\text{group}$ ); ns: non-significant; two-sided Mann-Whitney test. **d**, Relative abundance of the three BacMixC members in fecal samples collected from control (blue) and BacMixC-recipient (green) mice ( $n=5/\text{group}$ ) at day three post-infection as inferred from 16S rRNA gene amplicon sequencing. **e**, *C. difficile nanT* expression in fecal samples 2 days post-infection of antibiotic-treated control (blue) or and BacMixC-recipient (green) mice relative to growth in minimal medium containing 0.5% glucose ( $n=4/\text{group}$ ); ns: non-significant, two-tailed Welch two-sample *t* test. In **b**, **c**, **d** and **e**, boxes represent median, first and third quartile, and whiskers extend to the highest and lowest values that are within one and a half times the interquartile range. Source data are provided as a Source Data file.

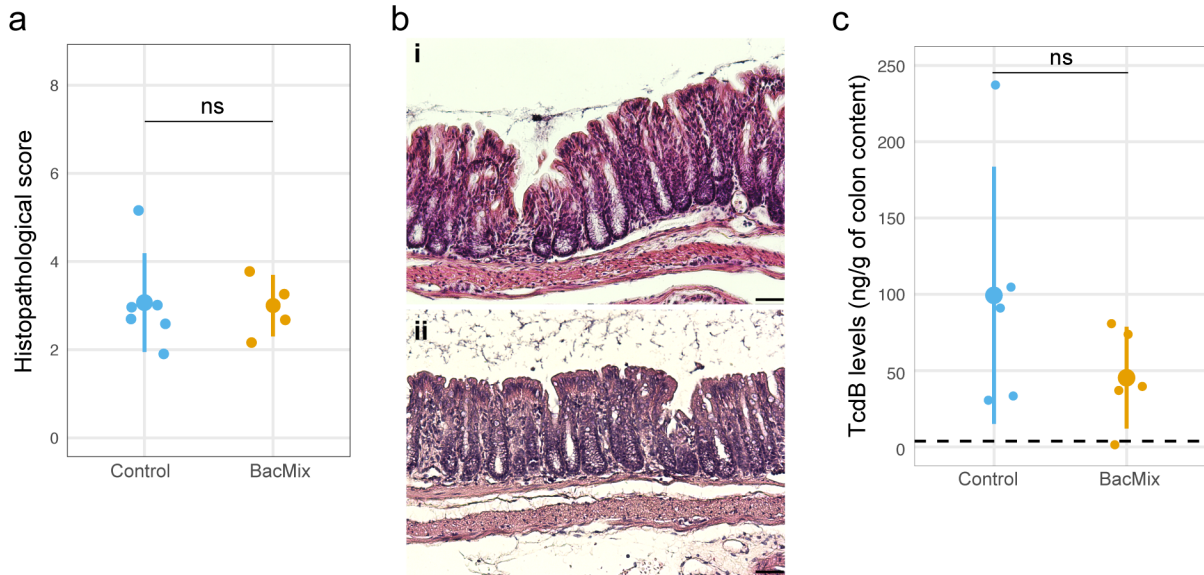

**Supplementary Figure 8. Inflammation scores and *C. difficile* toxin levels in control and BacMix-recipient mice three days post-infection.** **a**, Histopathology analysis was carried out on mouse colon tissue as described in the “Histology and histopathological scoring” section of Methods ( $n=6$  for control group,  $n=4$  for BacMix group). Small points represent the total histopathological score, large points represent the average score for each group and bars represent standard deviations; ns: non-significant, two-tailed Welch two-sample  $t$  test. **b**, Representative images of histologic sections stained with hematoxylin (blue/purple) and eosin (pink/red) from (i) control mice and (ii) BacMix recipient mice ( $n=5$  per group). Scale bar: 100  $\mu\text{m}$  **c**, Levels of TcdB were measured in colon contents of mice from the two different groups ( $n=5$  per group). Small points represent TcdB levels for each mouse, large points represents the average level for each group and bars represent standard deviations; ns: non-significant, two-tailed Welch two-sample  $t$  test. Source data are provided as a Source Data file.

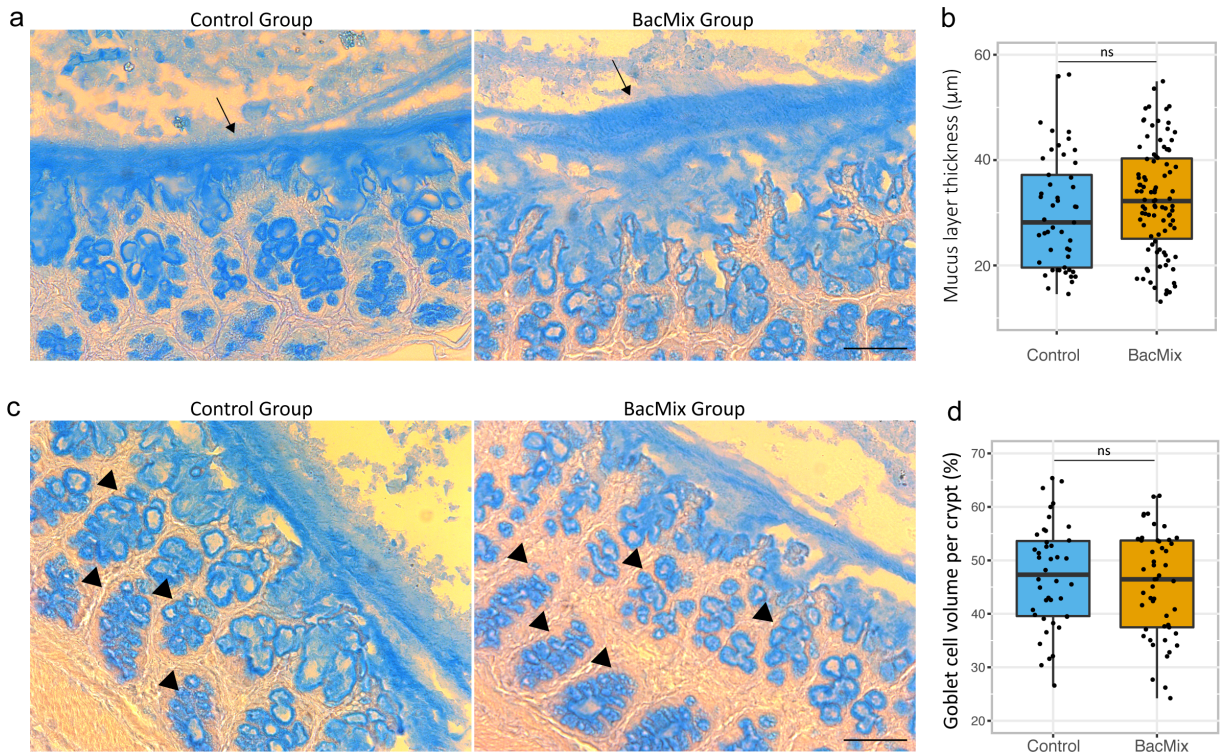

**Supplementary Figure 9.** Alcian Blue staining of paraffin embedded sections of the murine large intestine three days post-infection with *C. difficile*. **a**, Representative images of acquired fields. Stained mucus layer is indicated by arrows. **b**, Large intestine mucus layer thickness of control (blue) and BacMix-recipient (brown) mice. Measurements of a minimum of 50 independent areas obtained from different fields of view or within the same field of view at points  $50\mu\text{M}$  apart were acquired per condition. Measurements and representative images were obtained from sections ( $n=7$  for the control group;  $n=10$  for the BacMix group) of the large intestine of 4 different animals per group. **c**, Representative images of fields of view used for goblet cell volume measurements. Stained goblet cells are indicated by arrowheads. **d**, Goblet cell volume per crypt, obtained by dividing the area covered by positive Alcian blue staining by the total area of the crypt. A total of 43-51 crypts per condition were analyzed from sections ( $n=8$  for the control group;  $n=9$  for the BacMix group) of the large intestine of 4 different animals per group. **b**, **d**: Boxes represent median, first and third quartile. Whiskers extend to the highest and lowest values that are within one and a half times the interquartile range; ns: non-significant, two-sided Mann-Whitney test. **a**, **c**: Scale bar=  $50\mu\text{M}$ . Source data are provided as a Source Data file.

## Supplementary Tables

**Supplementary Table 1.** Total cells analysed, D-labeled cells sorted and MAGs recovered using RACS.

| Sorted fraction | Amendment | Incubation | Cells sorted | Cells rejected | % Cells sorted | # MAGs recovered* | % Cells sorted per amendment | # MAGs recovered per amendment |
|-----------------|-----------|------------|--------------|----------------|----------------|-------------------|------------------------------|--------------------------------|
| NanaB1          | NeuAc     | MonoB      | <b>28</b>    | 146            | 19%            | <b>5</b>          | 18%                          | <b>41</b>                      |
| NanaB2          | NeuAc     | MonoB      | <b>13</b>    | 74             | 18%            | <b>2</b>          |                              |                                |
| NanaB3          | NeuAc     | MonoB      | <b>14</b>    | 61             | 23%            | <b>4</b>          |                              |                                |
| Nana1           | NeuAc     | MonoA      | <b>23</b>    | 133            | 17%            | <b>4</b>          |                              |                                |
| Nana2           | NeuAc     | MonoA      | <b>15</b>    | 147            | 10%            | <b>3</b>          |                              |                                |
| Nana3           | NeuAc     | MonoA      | <b>22</b>    | 105            | 21%            | <b>10</b>         |                              |                                |
| NanaB5          | NeuAc     | MonoB      | <b>29</b>    | 98             | 30%            | <b>13</b>         |                              |                                |
| NanaB7          | NeuAc     | MonoB      | <b>6</b>     | 67             | 9%             | <b>0</b>          |                              |                                |
| GlcNAc4         | GlcNAc    | MonoA      | <b>20</b>    | 88             | 23%            | <b>11</b>         | 50%                          | <b>31</b>                      |
| GlcNAc5         | GlcNAc    | MonoA      | <b>38</b>    | 74             | 51%            | <b>0</b>          |                              |                                |
| GlcNAc6         | GlcNAc    | MonoA      | <b>32</b>    | 57             | 56%            | <b>2</b>          |                              |                                |
| GlcNAc12        | GlcNAc    | MonoB      | <b>34</b>    | 61             | 56%            | <b>10</b>         |                              |                                |
| GlcNAc13        | GlcNAc    | MonoB      | <b>33</b>    | 56             | 59%            | <b>8</b>          |                              |                                |
| GlcNAcB8        | GlcNAc    | MonoB      | <b>30</b>    | 40             | 75%            | <b>0</b>          |                              |                                |
| FucD1           | Fucose    | MonoA      | <b>14</b>    | 258            | 5%             | <b>3</b>          | 7%                           | <b>23</b>                      |
| FucD2           | Fucose    | MonoA      | <b>18</b>    | 294            | 6%             | <b>9</b>          |                              |                                |
| FucD3           | Fucose    | MonoA      | <b>19</b>    | 293            | 6%             | <b>0</b>          |                              |                                |
| FucA1           | Fucose    | MonoB      | <b>14</b>    | 173            | 8%             | <b>0</b>          |                              |                                |
| FucA2           | Fucose    | MonoB      | <b>33</b>    | 337            | 10%            | <b>6</b>          |                              |                                |
| FucA3           | Fucose    | MonoB      | <b>24</b>    | 354            | 7%             | <b>5</b>          |                              |                                |
| GalD1           | Galactose | MonoA      | <b>25</b>    | 217            | 12%            | <b>0</b>          | 16%                          | <b>36</b>                      |
| GalD2           | Galactose | MonoA      | <b>37</b>    | 191            | 19%            | <b>4</b>          |                              |                                |
| GalD3           | Galactose | MonoA      | <b>16</b>    | 137            | 12%            | <b>7</b>          |                              |                                |
| GalA1           | Galactose | MonoB      | <b>20</b>    | 99             | 20%            | <b>5</b>          |                              |                                |
| GalA2           | Galactose | MonoB      | <b>16</b>    | 96             | 17%            | <b>10</b>         |                              |                                |
| GalA3           | Galactose | MonoB      | <b>49</b>    | 293            | 17%            | <b>10</b>         |                              |                                |
| GalNAcD1        | GalNAc    | MonoA      | <b>50</b>    | 308            | 16%            | <b>10</b>         | 10%                          | <b>43</b>                      |
| GalNAcD2        | GalNAc    | MonoA      | <b>53</b>    | 335            | 16%            | <b>9</b>          |                              |                                |
| GalNAcD3        | GalNAc    | MonoA      | <b>14</b>    | 283            | 5%             | <b>13</b>         |                              |                                |
| GalNAcA1        | GalNAc    | MonoB      | <b>20</b>    | 228            | 9%             | <b>0</b>          |                              |                                |
| GalNAcA2        | GalNAc    | MonoB      | <b>23</b>    | 264            | 9%             | <b>8</b>          |                              |                                |
| GalNAcA3        | GalNAc    | MonoB      | <b>33</b>    | 532            | 6%             | <b>3</b>          |                              |                                |
| Neg_ctrl1       | None      | MonoA      | <b>0</b>     | 103            | -              | <b>0</b>          |                              |                                |
| Neg_ctrl2       | None      | MonoB      | <b>0</b>     | 106            | -              | <b>0</b>          |                              |                                |

\*completeness >50% & contamination <10%

**Supplementary Table 2.** Pairwise Average nucleotide identity<sup>a</sup> (ANI) between RACS-retrieved MAGs, metagenome-retrieved MAGs (MMAGs) and BacMix/BacMixC genomes.

| query genome                                                | reference genome              | ANI <sup>a,b</sup> | alignment coverage <sup>c</sup> |
|-------------------------------------------------------------|-------------------------------|--------------------|---------------------------------|
| <b>RACS-MAG / MMAG pairs</b>                                |                               |                    |                                 |
| Muribaculaceae bacterium RACS_001                           | MMAG_115                      | 0.999              | 0.956                           |
| Muribaculum sp. RACS_002                                    | MMAG_76                       | 1.000              | 0.935                           |
| Muribaculaceae bacterium RACS_003                           | MMAG_42                       | 0.999              | 1.001                           |
| Bacteroidales bacterium RACS_004                            | MMAG_59                       | 1.000              | 0.994                           |
| Burkholderiaceae bacterium RACS_005                         | MMAG_16                       | 0.999              | 0.933                           |
| Alistipes sp. RACS_006                                      | MMAG_53                       | 1.000              | 0.926                           |
| Lachnospiraceae bacterium RACS_007                          | MMAG_98                       | 1.000              | 0.971                           |
| Muribaculaceae bacterium RACS_008                           | MMAG_77                       | 0.997              | 0.950                           |
| Muribaculaceae bacterium RACS_009                           | MMAG_11                       | 1.000              | 0.948                           |
| Lachnospiraceae bacterium RACS_010                          | MMAG_73                       | 1.000              | 0.987                           |
| Muribaculaceae bacterium RACS_011                           | MMAG_15                       | 1.000              | 0.896                           |
| Muribaculaceae bacterium RACS_012                           | MMAG_14                       | 1.000              | 0.945                           |
| Muribaculaceae bacterium RACS_013                           | MMAG_12                       | 0.999              | 0.894                           |
| Muribaculaceae bacterium RACS_014                           | MMAG_62                       | 0.999              | 0.893                           |
| Muribaculaceae bacterium RACS_015                           | MMAG_37                       | 0.997              | 0.944                           |
| Muribaculaceae bacterium RACS_016                           | MMAG_101                      | 0.999              | 0.955                           |
| Muribaculaceae bacterium RACS_017                           | MMAG_49                       | 1.000              | 0.953                           |
| Muribaculaceae bacterium RACS_018                           | MMAG_45                       | 0.992              | 0.881                           |
| Muribaculaceae bacterium RACS_019                           | MMAG_35                       | 1.000              | 0.920                           |
| Mailhela sp. RACS_020                                       | MMAG_109                      | 0.999              | 0.965                           |
| Bacteroides sp. RACS_021                                    | MMAG_104                      | 1.000              | 0.835                           |
| Muribaculaceae bacterium RACS_022                           | MMAG_84                       | 1.000              | 0.883                           |
| Odoribacter sp. RACS_023                                    | MMAG_36                       | 1.000              | 0.942                           |
| Muribaculaceae bacterium RACS_024                           | MMAG_99                       | 0.999              | 0.853                           |
| Muribaculaceae bacterium RACS_025                           | MMAG_107                      | 0.999              | 0.969                           |
| Alistipes sp. RACS_026                                      | MMAG_47                       | 1.000              | 0.881                           |
| Angelakisella sp. RACS_027                                  | MMAG_27                       | 0.999              | 0.705                           |
| Desulfovibrio sp. RACS_028                                  | MMAG_110                      | 0.994              | 0.850                           |
| Candidatus Saccharibacteria bacterium RACS_029              | MMAG_26                       | 0.999              | 0.861                           |
| Muribaculaceae bacterium RACS_030                           | MMAG_118                      | 1.000              | 0.839                           |
| Muribaculaceae bacterium RACS_031                           | MMAG_29                       | 1.000              | 0.887                           |
| Alphaproteobacteria bacterium RACS_032                      | MMAG_61                       | 1.000              | 0.959                           |
| Prevotella sp. RACS_033                                     | MMAG_114                      | 0.999              | 0.900                           |
| Clostridia bacterium RACS_034                               | MMAG_65                       | 0.998              | 0.710                           |
| Muribaculaceae bacterium RACS_036                           | MMAG_18                       | 1.000              | 0.936                           |
| Bacteroidaceae bacterium RACS_037                           | MMAG_72                       | 0.999              | 0.934                           |
| Ruthenibacterium sp. RACS_038                               | MMAG_54                       | 1.000              | 0.893                           |
| Lactobacillus sp. RACS_039                                  | MMAG_66                       | 0.999              | 0.387                           |
| Muribaculaceae bacterium RACS_040                           | MMAG_34                       | 0.997              | 0.606                           |
| Lachnospiraceae bacterium RACS_041                          | MMAG_100                      | 0.998              | 0.527                           |
| Clostridia bacterium RACS_042                               | MMAG_25                       | 0.999              | 0.757                           |
| Odoribacter sp. RACS_043                                    | MMAG_88                       | 1.000              | 0.868                           |
| Clostridia bacterium RACS_045                               | MMAG_57                       | 0.999              | 0.942                           |
| Dorea sp. RACS_046                                          | MMAG_92                       | 0.997              | 0.949                           |
| <b>BacMix member - Closest sorted organism</b>              |                               |                    |                                 |
| Akkermansia muciniphila strain Muc                          | Akkermansia sp. RACS_044      | 0.991              | 0.871                           |
| Muribaculum intestinale strain YL27                         | Muribaculum sp. RACS_002      | 0.999              | 0.951                           |
| Ruthenibacterium lactatiformans strain 585-1                | Ruthenibacterium sp. RACS_038 | 0.841              | 0.140                           |
| Alistipes timonensis strain JC136                           | Alistipes sp RACS_026         | 0.849              | 0.300                           |
| Bacteroides sp. Isolate FP24                                | Bacteroides sp. RACS_021      | 0.998              | 0.946                           |
| <b>BacMixC member - Closest sorted organism<sup>d</sup></b> |                               |                    |                                 |
| Escherichia/Shigella sp. isolate FP11                       | -                             | -                  | -                               |
| Anaerotruncus colihominis Isolate FP23                      | -                             | -                  | -                               |
| Lactobacillus hominis strain DSM23910                       | -                             | -                  | -                               |

<sup>a</sup> Richter, M., and Rossello-Mora, R. (2009) Shifting the genomic gold standard for the prokaryotic species definition. *Proc Natl Acad Sci U S A* **106**: 19126-19131

<sup>b</sup>Pairwise ANI was calculated for all genome pairs, but values are highly similar (less than 0.001 different) than from the ones shown here for one-way ANI.

<sup>c</sup> An alignment coverage of 0.1 was used as a cut-off

<sup>d</sup> no closest sorted organism could be found based on a cut-off alignment of 0.1

**Supplementary Table 3.** Number of hits for mucin-degrading enzymes (per sequenced Megabase pair) in scaffolds from each sorted fraction or microcosms metagenome.

| Scaffold from Sorted fraction/Metagenome |                      | Number of hits per sequenced Mbp for each Mucin-degrading enzyme |                                           |                         |                                               |                                                     |                                               |                                                |                                                |                                              |
|------------------------------------------|----------------------|------------------------------------------------------------------|-------------------------------------------|-------------------------|-----------------------------------------------|-----------------------------------------------------|-----------------------------------------------|------------------------------------------------|------------------------------------------------|----------------------------------------------|
|                                          |                      | Alpha-N-acetylglucosaminidase (EC 3.2.1.50)                      | Mucin-desulfating sulfatase (EC 3.1.6.14) | Sialidase (EC 3.2.1.18) | Alpha-L-fucosidase (EC 3.2.1.51), GH29 family | Alpha-L-fucosidase (EC 3.2.1.51), GH29 family, GH95 | Beta-hexosaminidase (EC 3.2.1.52), GH3 family | Beta-hexosaminidase (EC 3.2.1.52), GH20 family | Alpha-galactosidase (EC 3.2.1.22), GH36 family | Beta-galactosidase (EC 3.2.1.23), GH2 family |
| Scaffold from Sorted fraction/Metagenome | Number of base pairs |                                                                  |                                           |                         |                                               |                                                     |                                               |                                                |                                                |                                              |
| Nana1                                    | 7213673              | 0.69                                                             | 0.83                                      | 0.28                    | 1.66                                          | 0.55                                                | 2.08                                          | 1.25                                           | 0.42                                           | 2.77                                         |
| Nana2                                    | 21548606             | 0.09                                                             | 0.19                                      | 0.46                    | 1.16                                          | 0.32                                                | 0.88                                          | 1.11                                           | 0.37                                           | 1.49                                         |
| Nana3                                    | 121404695            | 0.07                                                             | 0.08                                      | 0.17                    | 0.86                                          | 0.17                                                | 1.26                                          | 0.49                                           | 0.63                                           | 2.14                                         |
| NanaB1                                   | 35082564             | 0.29                                                             | 0.11                                      | 0.31                    | 1.23                                          | 0.31                                                | 0.83                                          | 0.94                                           | 0.37                                           | 1.94                                         |
| NanaB2                                   | 23693278             | 0.30                                                             | 0.17                                      | 0.51                    | 1.94                                          | 0.30                                                | 1.10                                          | 1.18                                           | 0.59                                           | 2.53                                         |
| NanaB3                                   | 26507725             | 0.34                                                             | 0.15                                      | 0.45                    | 1.36                                          | 0.34                                                | 0.94                                          | 1.09                                           | 0.72                                           | 2.11                                         |
| NanaB5                                   | 222041970            | 0.08                                                             | 0.06                                      | 0.13                    | 0.81                                          | 0.15                                                | 0.94                                          | 0.43                                           | 0.68                                           | 1.82                                         |
| NanaB7                                   | 24704093             | 0.08                                                             | 0.04                                      | 0.36                    | 1.46                                          | 0.36                                                | 0.85                                          | 0.69                                           | 0.73                                           | 2.55                                         |
| GlcNAc4                                  | 115580502            | 0.13                                                             | 0.04                                      | 0.14                    | 0.80                                          | 0.18                                                | 1.12                                          | 0.37                                           | 0.67                                           | 1.79                                         |
| GlcNAc5                                  | 14627058             | 0.00                                                             | 0.21                                      | 0.07                    | 0.62                                          | 0.00                                                | 0.34                                          | 0.41                                           | 0.68                                           | 1.57                                         |
| GlcNAc6                                  | 22873773             | 0.13                                                             | 0.09                                      | 0.35                    | 0.74                                          | 0.17                                                | 0.92                                          | 0.57                                           | 0.70                                           | 2.36                                         |
| GlcNAc12                                 | 109078488            | 0.16                                                             | 0.17                                      | 0.28                    | 1.16                                          | 0.28                                                | 1.31                                          | 0.83                                           | 0.51                                           | 2.52                                         |
| GlcNAc13                                 | 87038963             | 0.26                                                             | 0.16                                      | 0.21                    | 1.38                                          | 0.33                                                | 1.37                                          | 1.10                                           | 0.44                                           | 3.00                                         |
| GlcNAcB8                                 | 7967293              | 0.25                                                             | 0.00                                      | 0.13                    | 1.51                                          | 0.38                                                | 1.00                                          | 0.50                                           | 0.88                                           | 4.27                                         |
| FucA2                                    | 59303066             | 0.08                                                             | 0.07                                      | 0.27                    | 1.11                                          | 0.19                                                | 1.18                                          | 0.61                                           | 0.51                                           | 2.28                                         |
| FucA3                                    | 73391190             | 0.16                                                             | 0.10                                      | 0.26                    | 1.02                                          | 0.20                                                | 1.08                                          | 0.56                                           | 0.60                                           | 2.23                                         |
| FucD1                                    | 22703868             | 0.18                                                             | 0.13                                      | 0.13                    | 1.45                                          | 0.22                                                | 1.37                                          | 0.66                                           | 0.57                                           | 1.98                                         |
| FucD2                                    | 74145148             | 0.09                                                             | 0.15                                      | 0.34                    | 1.07                                          | 0.23                                                | 1.11                                          | 0.63                                           | 0.51                                           | 2.35                                         |
| FucD3                                    | 11779936             | 0.08                                                             | 0.25                                      | 0.42                    | 1.02                                          | 0.17                                                | 0.93                                          | 1.19                                           | 0.59                                           | 2.80                                         |
| GalA1                                    | 110060846            | 0.15                                                             | 0.08                                      | 0.21                    | 1.16                                          | 0.25                                                | 1.06                                          | 0.68                                           | 0.52                                           | 2.07                                         |
| GalA2                                    | 55938931             | 0.11                                                             | 0.11                                      | 0.27                    | 0.97                                          | 0.29                                                | 1.25                                          | 0.66                                           | 0.32                                           | 1.68                                         |
| GalA3                                    | 90463397             | 0.09                                                             | 0.06                                      | 0.19                    | 0.85                                          | 0.22                                                | 1.11                                          | 0.59                                           | 0.44                                           | 1.72                                         |
| GalD1                                    | 11860294             | 0.08                                                             | 0.59                                      | 0.51                    | 1.18                                          | 0.17                                                | 0.84                                          | 1.35                                           | 0.25                                           | 2.11                                         |
| GalD2                                    | 63170605             | 0.09                                                             | 0.05                                      | 0.21                    | 1.04                                          | 0.19                                                | 1.11                                          | 0.54                                           | 0.43                                           | 2.04                                         |
| GalD3                                    | 78544204             | 0.14                                                             | 0.06                                      | 0.20                    | 0.92                                          | 0.19                                                | 1.08                                          | 0.46                                           | 0.57                                           | 1.99                                         |
| GalNAcA1                                 | 10887300             | 0.09                                                             | 0.09                                      | 0.18                    | 2.30                                          | 0.37                                                | 1.19                                          | 1.01                                           | 0.46                                           | 3.95                                         |
| GalNAcA2                                 | 75542222             | 0.09                                                             | 0.13                                      | 0.30                    | 1.09                                          | 0.26                                                | 1.10                                          | 0.57                                           | 0.49                                           | 1.05                                         |
| GalNAcA3                                 | 21962081             | 0.09                                                             | 0.14                                      | 0.09                    | 1.14                                          | 0.23                                                | 1.23                                          | 0.41                                           | 0.50                                           | 1.91                                         |
| GalNAcD1                                 | 106397377            | 0.15                                                             | 0.08                                      | 0.23                    | 1.18                                          | 0.23                                                | 1.11                                          | 0.77                                           | 0.55                                           | 1.00                                         |
| GalNAcD2                                 | 55866911             | 0.14                                                             | 0.13                                      | 0.30                    | 1.07                                          | 0.27                                                | 1.16                                          | 0.72                                           | 0.38                                           | 4.22                                         |
| GalNAcD3                                 | 90684184             | 0.08                                                             | 0.08                                      | 0.22                    | 0.86                                          | 0.23                                                | 1.04                                          | 0.55                                           | 0.47                                           | 2.60                                         |
| Metagenome_MonoA                         | 812432886            | 0.05                                                             | 0.03                                      | 0.17                    | 0.69                                          | 0.11                                                | 0.90                                          | 0.28                                           | 0.83                                           | 1.59                                         |
| Metagenome_MonoB                         | 694781510            | 0.06                                                             | 0.04                                      | 0.19                    | 0.77                                          | 0.14                                                | 1.11                                          | 0.29                                           | 0.97                                           | 1.72                                         |
| <b>Average sorted fractions:</b>         |                      | <b>0.15</b>                                                      | <b>0.15</b>                               | <b>0.26</b>             | <b>1.16</b>                                   | <b>0.25</b>                                         | <b>1.09</b>                                   | <b>0.74</b>                                    | <b>0.53</b>                                    | <b>2.29</b>                                  |
| <b>Average metagenome:</b>               |                      | <b>0.05</b>                                                      | <b>0.03</b>                               | <b>0.18</b>             | <b>0.73</b>                                   | <b>0.13</b>                                         | <b>1.00</b>                                   | <b>0.29</b>                                    | <b>0.90</b>                                    | <b>1.66</b>                                  |
| <b>Ratio Sorted Fraction/Metagenome:</b> |                      | <b>2.8275</b>                                                    | <b>4.391</b>                              | <b>1.464</b>            | <b>1.597</b>                                  | <b>1.989</b>                                        | <b>1.089</b>                                  | <b>2.571</b>                                   | <b>0.5953</b>                                  | <b>1.3791</b>                                |



**Supplementary Table 4.** Number of total and D-labeled peptides identified by Mass Spectrometry for each analyzed sample.

| Microcosms                       | Amendment | total peptides | total matched peptides <sup>a</sup> | % total peptides matched | peptides with D incorporation | % peptides with D incorporated |
|----------------------------------|-----------|----------------|-------------------------------------|--------------------------|-------------------------------|--------------------------------|
| NoAmendment_MonoA                | NA        | 2336           | 2062                                | 88%                      | 4                             | 0.17%                          |
| NoAmendment_MonoB                | NA        | 4741           | 4406                                | 93%                      | 7                             | 0.15%                          |
| NoAmendment_MonoC                | NA        | 6111           | 5812                                | 95%                      | 6                             | 0.10%                          |
| NeuAc_MonoA                      | NeuAc     | 8589           | 8204                                | 96%                      | 52                            | 0.61%                          |
| NeuAc_MonoB                      | NeuAc     | 6808           | 6424                                | 94%                      | 31                            | 0.46%                          |
| NeuAc_MonoC                      | NeuAc     | 16676          | 16354                               | 98%                      | 38                            | 0.23%                          |
| GlcNAc_MonoA                     | GlcNAc    | 6456           | 6155                                | 95%                      | 36                            | 0.56%                          |
| GlcNAc_MonoB                     | GlcNAc    | 9079           | 8624                                | 95%                      | 42                            | 0.46%                          |
| GlcNAc_MonoC                     | GlcNAc    | 14975          | 14602                               | 98%                      | 62                            | 0.41%                          |
| fucose_MonoA                     | Fucose    | 11428          | 11080                               | 97%                      | 45                            | 0.39%                          |
| fucose_MonoB                     | Fucose    | 10080          | 9668                                | 96%                      | 34                            | 0.34%                          |
| fucose_MonoC                     | Fucose    | 16456          | 16052                               | 98%                      | 56                            | 0.34%                          |
| galactose_MonoA                  | Galactose | 12425          | 12032                               | 97%                      | 98                            | 0.79%                          |
| galactose_MonoB                  | Galactose | 7464           | 7074                                | 95%                      | 93                            | 1.25%                          |
| galactose_MonoC                  | Galactose | 13555          | 13140                               | 97%                      | 52                            | 0.38%                          |
| GalNAc_MonoA                     | GalNAc    | 9172           | 8865                                | 97%                      | 69                            | 0.75%                          |
| GalNAc_MonoB                     | GalNAc    | 8326           | 7900                                | 95%                      | 54                            | 0.65%                          |
| GalNAc_MonoC                     | GalNAc    | 14163          | 13799                               | 97%                      | 56                            | 0.40%                          |
| mucin_MonoA                      | Mucin     | 9601           | 9226                                | 96%                      | 96                            | 1.00%                          |
| mucin_MonoB                      | Mucin     | 8505           | 8064                                | 95%                      | 137                           | 1.61%                          |
| mucin_MonoC                      | Mucin     | 11300          | 10845                               | 96%                      | 742                           | 6.57%                          |
| <b>Average match all samples</b> |           |                |                                     | <b>96%</b>               |                               |                                |

Note: In all columns "peptides" refers to unique peptide sequences retrieved

<sup>a</sup> refers to the number of peptides that match a particular protein sequence from the microcosms metagenome database

**Supplementary Table 5.** Identity and relative isotope (D) abundance (RIA) of D labeled peptides that match selected proteins involved in mucosal sugar uptake.

| Peptide Sequence               | Protein Accessions <sup>a</sup>             | RT <sup>b</sup> | Exp. m/z  | Theo. m/z | Charge | RIA (D) |
|--------------------------------|---------------------------------------------|-----------------|-----------|-----------|--------|---------|
| LPEHAIK                        | N-ACETYLNEURAMINATE LYASE                   | 22.18           | 439.7585  | 439.7584  | 2      | 6.4     |
| LIGLDLGK                       | N-ACETYLNEURAMINATE LYASE                   | 59.18           | 414.7631  | 414.7631  | 2      | 5.2     |
| AFAEGDVETAR                    | N-ACETYLNEURAMINATE LYASE                   | 33.26           | 583.2778  | 583.2778  | 2      | 4.9     |
| MTEEIYDKAEFEK                  | L-FUCOSE ISOMERASE                          | 46.38           | 816.8767  | 816.8767  | 2      | 3.1     |
| ALAGEVAELIR                    | GLUCOSAMINE-6-PHOSPHATE DEAMINASE 1         | 72.11           | 571.3324  | 571.3324  | 2      | 11      |
| MYETHHGMSK                     | GALACTOKINASE                               | 14.9            | 407.5111  | 407.5111  | 3      | 6.3     |
| EYGVGTGSR                      | GALACTOKINASE                               | 20.76           | 434.7118  | 434.7116  | 2      | 5.7     |
| KYAFDDEGK                      | PUTATIVE ENDO-BETA-N-ACETYLGALUCOSAMINIDASE | 23.54           | 536.7509  | 536.7509  | 2      | 4.9     |
| FNLGDIVTSMIK                   | ALPHA-N-ACETYLGALACTOSAMINIDASE             | 104.6           | 669.3603  | 669.3603  | 2      | 4.6     |
| LIGLDLGK                       | N-ACETYLNEURAMINATE LYASE                   | 59.87           | 414.7631  | 414.7631  | 2      | 4.6     |
| INESLDLGGVREPLPQLIESDLAIAQEAAR | N-ACETYLNEURAMINATE LYASE                   | 104.7           | 1073.2403 | 1073.2403 | 3      | 4.1     |
| AFLSPLEISLLPYGGR               | N-ACETYLHEXOSAMINE 1-KINASE                 | 103.47          | 866.9853  | 866.9853  | 2      | 4       |
| LVLMDSVVK                      | GALACTOKINASE                               | 59.68           | 502.2965  | 502.2965  | 2      | 3.5     |
| M(Oxidation)LFGWVDENSAER       | PUTATIVE ENDO-BETA-N-ACETYLGALUCOSAMINIDASE | 64.87           | 785.3538  | 785.3538  | 2      | 3.5     |

<sup>a</sup> RAST Annotation of the protein(s) matched in metagenome database

<sup>b</sup> Retention time

**Supplementary Table 6.** Retention times and MS parameters of individual sugars.

| Analytes         | RTs<br>[min] | Parent ion<br>[ <i>m/z</i> ] | S-Lens<br>[V]                        | Product ions                 |                             |        |       |    |
|------------------|--------------|------------------------------|--------------------------------------|------------------------------|-----------------------------|--------|-------|----|
|                  |              |                              |                                      | Quantifier<br>[ <i>m/z</i> ] | Qualifier<br>[ <i>m/z</i> ] |        |       |    |
|                  |              |                              |                                      | CE [V]                       |                             | CE [V] |       |    |
| <b>Galactose</b> | 16           | 178.971                      | [M-H] <sup>-</sup>                   | 28                           | 88                          | 6      | 59    | 18 |
| <b>GalNAc</b>    | 10.2         | 204.005                      | [M+H-H <sub>2</sub> O] <sup>+</sup>  | 55                           | 138                         | 13     | 186   | 6  |
| <b>GlcNAc</b>    | 10.9         | 185.997                      | [M+H-2H <sub>2</sub> O] <sup>+</sup> | 60                           | 138                         | 14     | 144   | 15 |
| <b>Fucose</b>    | 5.8          | 163                          | [M-H] <sup>-</sup>                   | 50                           | 89                          | 5      | 102.9 | 5  |
| <b>NeuAc</b>     | 25.8         | 308.480                      | [M-H] <sup>-</sup>                   | 60                           | 86.9                        | 18     | 170   | 16 |

**Supplementary Table 7 – Oligonucleotides used in this study.**

| <b>Gene</b>                                              | <b>Forward primer <sup>a</sup></b> | <b>Reverse primer <sup>a</sup></b>   |
|----------------------------------------------------------|------------------------------------|--------------------------------------|
| <b>16S rRNA gene amplicon sequencing</b>                 |                                    |                                      |
| 16S rRNA                                                 | GCTATGCGCGAGCTGCCCTACGGGNGGCWGCAG  | GCTATGCGCGAGCTGCGACTACHVGGGTATCTATCC |
| <b>qPCR primers targeting <i>C. difficile</i> genome</b> |                                    |                                      |
| 16S rRNA                                                 | GCAAGTTGAGCGATTTACTTCGGT           | GTACTIONGCTCACCTTTGATATTYAAGAG       |
| <i>dnaF</i>                                              | TCCATCTATTGCAGGGTGGT               | CCCAACTCTTCGCTAAGCAC                 |
| <i>nanA</i>                                              | GTGTAGATGGGGCAATTGGT               | ATCCAGCCTCAACACCTTGT                 |
| <i>nanT</i>                                              | ATCAATGGGACTTGCAACAGT              | CAACTGAATTAAGCCCTGTCTG               |
| <i>nagB</i>                                              | AAAGCTGTAAGTATGGGAATAGGT           | GAACCAGGAACCTCTGGAGTTAT              |

<sup>a</sup>all sequences are in the 5' to 3' direction

**Supplementary Table 8.** GenBank accession numbers for the RACS MAGS.

| <b>Accession code</b> | <b>Description</b>                             |
|-----------------------|------------------------------------------------|
| WSLP00000000          | Muribaculaceae bacterium RACS_001              |
| WSLQ00000000          | Muribaculum sp. RACS_002                       |
| WSLR00000000          | Muribaculaceae bacterium RACS_003              |
| WSLS00000000          | Bacteroidales bacterium RACS_004               |
| WSLT00000000          | Burkholderiaceae bacterium RACS_005            |
| WSLU00000000          | Alistipes sp. RACS_006                         |
| WSLV00000000          | Lachnospiraceae bacterium RACS_007             |
| WSLW00000000          | Muribaculaceae bacterium RACS_008              |
| WSLX00000000          | Muribaculaceae bacterium RACS_009              |
| WSLY00000000          | Lachnospiraceae bacterium RACS_010             |
| WSLZ00000000          | Muribaculaceae bacterium RACS_011              |
| WSMA00000000          | Muribaculaceae bacterium RACS_012              |
| WSMB00000000          | Muribaculaceae bacterium RACS_013              |
| WSMC00000000          | Muribaculaceae bacterium RACS_014              |
| WSMD00000000          | Muribaculaceae bacterium RACS_015              |
| WSME00000000          | Muribaculaceae bacterium RACS_016              |
| WSMF00000000          | Muribaculaceae bacterium RACS_017              |
| WSMG00000000          | Muribaculaceae bacterium RACS_018              |
| WSMH00000000          | Muribaculaceae bacterium RACS_019              |
| WSMI00000000          | Mailhella sp. RACS_020                         |
| WSMJ00000000          | Bacteroides sp. RACS_021                       |
| WSMK00000000          | Muribaculaceae bacterium RACS_022              |
| WSML00000000          | Odoribacter sp. RACS_023                       |
| WSMM00000000          | Muribaculaceae bacterium RACS_024              |
| WSMN00000000          | Muribaculaceae bacterium RACS_025              |
| WSMO00000000          | Alistipes sp. RACS_026                         |
| WSMP00000000          | Angelakisella sp. RACS_027                     |
| WSMQ00000000          | Desulfovibrio sp. RACS_028                     |
| WSMR00000000          | Candidatus Saccharibacteria bacterium RACS_029 |
| WSMS00000000          | Muribaculaceae bacterium RACS_030              |
| WSMT00000000          | Muribaculaceae bacterium RACS_031              |
| WSMU00000000          | Alphaproteobacteria bacterium RACS_032         |
| WSMV00000000          | Prevotella sp. RACS_033                        |
| WSMW00000000          | Clostridia bacterium RACS_034                  |
| WSMX00000000          | Parabacteroides sp. RACS_035                   |
| WSMY00000000          | Muribaculaceae bacterium RACS_036              |
| WSMZ00000000          | Bacteroidaceae bacterium RACS_037              |
| WSNA00000000          | Ruthenibacterium sp. RACS_038                  |
| WSNB00000000          | Lactobacillus sp. RACS_039                     |
| WSNC00000000          | Muribaculaceae bacterium RACS_040              |
| WSND00000000          | Lachnospiraceae bacterium RACS_041             |
| WSNE00000000          | Clostridia bacterium RACS_042                  |
| WSNF00000000          | Odoribacter sp. RACS_043                       |
| WSNG00000000          | Akkermansia sp. RACS_044                       |
| WSNH00000000          | Clostridia bacterium RACS_045                  |
| WSNI00000000          | Dorea sp. RACS_046                             |
| WSNJ00000000          | Clostridia bacterium RACS_047                  |
| WSNK00000000          | Candidatus Saccharibacteria bacterium RACS_048 |
| WSNL00000000          | Flavobacteriales bacterium RACS_049            |
| WSNM00000000          | Clostridia bacterium RACS_050                  |
| WSNN00000000          | Parabacteroides sp. RACS_051                   |
